# Supplementary material
Source: ML conference proceedings conference paper supplement (https://openaccess.thecvf.com/content/ICCV2023/html/Jang_Dynamic_Mesh_Recovery_ICCV_2023_paper.html)
Supplement: Supplementary file 1 [file Jang_Dynamic_Mesh_Recovery_ICCV_2023_supplemental.zip]

Archive with 2 entries (2 files):
- Supp_Dynamic_Mesh_Recovery_from_Partial_Point_Cloud_Sequence.pdf
- video.mp4
